# Supplementary material
Source: publisher figshare collection journal article supplement (https://tandf.figshare.com/ndownloader/files/15007985)
Supplement: Supplementary file 1 [file 15007985]

## Acknowledgements

The research reported in this article has been produced as part of TOULL – Tourism and Life-long Learning project sponsored by the EU Tempus programme. For more information on TOULL, see <http://www.tempus-tourism.aau.dk>. The authors are grateful for inputs and comments from the other members of the TOULL consortium throughout the project. In particular, we would like to thank Constantia Anastasiadou, Edinburgh Napier University, UK; Alexander Dunets, Altai State Technical University, Russia; Anna Surtseva and Yuliya Gizey, Kemerovo State University, Russia; Natalia Kolodiy, Tomsk Polytechnic University, Russia; Angela Benson, Brighton University, UK; Terry Brathwaite, Coventry University, UK; and Michael Mair, FHWien University of Applied Science, Austria.
